# Supplementary material for: Brief communication: Depth-averaging of 3D depth-resolved MPM simulation results of geophysical flows for GIS visualization
Source: Copernicus journal article supplement (doi:10.5194/nhess-25-3897-2025), 2025-10-09
Supplement: Supplementary file [file nhess-25-3897-2025-supplement-title-page.pdf › nhess-25-3897-2025-supplement-title-page.pdf]

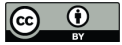

## *Supplement of*

# **Brief communication: Depth-averaging of 3D depth-resolved MPM simulation results of geophysical flows for GIS visualization**

**Hervé Vicari et al.**

*Correspondence to:* Hervé Vicari ([herve.vicari@slf.ch](mailto:herve.vicari@slf.ch))

- [nhess-25-3897-2025-supplement-title-page.pdf](#)
- Supplements
  - [GIS\\_exporting\\_simulation.txt](#)
  - [GIS\\_exporting\\_terrain.txt](#)
  - [GIS\\_terrain\\_export\\_20250806](#)
  - [Vicari\\_et\\_al\\_2024\\_NHESS\\_Supplements.pdf](#)
  - [whymper\\_NHESS.mp4](#)

The copyright of individual parts of the supplement might differ from the article licence.
